# Supplementary material for: K-Ras and β-catenin mutations cooperate with Fgfr3 mutations in mice to promote tumorigenesis in the skin and lung, but not in the bladder
Source: PubMed Central journal article supplement — Dis Model Mech. 2011 Apr 18;4(4):548–55. doi: 10.1242/dmm.006874 (PMC3124065; doi:10.1242/dmm.006874), 2011-04-18
Supplement: supp_006874_DMM006874TableS1.pdf [file supp_006874_DMM006874TableS1.pdf]

| Mouse models                                                                        | <i>n</i> | Bladder tumors                | Skin tumors                  | Lung tumors                                   |
|-------------------------------------------------------------------------------------|----------|-------------------------------|------------------------------|-----------------------------------------------|
| <i>UroIIICre<sup>+</sup>Fgfr3<sup>+/K644E</sup></i>                                 | 20       | None                          | None                         | None                                          |
| <i>UroIIICre<sup>+</sup>Fgfr3<sup>+/K644M</sup></i>                                 | 20       | None                          | None                         | None                                          |
| <i>UroIIICre<sup>+</sup>KRas<sup>G12D/+</sup></i>                                   | 22       | None                          | None                         | None                                          |
| <i>UroIIICre<sup>+</sup>Fgfr3<sup>+/K644E</sup><br/>K-Ras<sup>G12D/+</sup></i>      | 23       | None                          | papilloma<br>(44%, 220 days) | None                                          |
| <i>UroIIICre<sup>+</sup>β-Catenin<sup>exon3/+</sup></i>                             | 28       | Hyperproliferati<br>on (100%) | None                         | None                                          |
| <i>UroIIICre<sup>+</sup>Fgfr3<sup>+/K644E</sup><br/>β-Catenin<sup>exon3/+</sup></i> | 27       | Hyperproliferati<br>on (100%) | None                         | Solitary fibrous<br>tumors<br>(36%, 354 days) |
